# Supplementary material for: Meningococcal Deduced Vaccine Antigen Reactivity (MenDeVAR) Index: a Rapid and Accessible Tool That Exploits Genomic Data in Public Health and Clinical Microbiology Applications
Source: PubMed Central journal article supplement (PMC7771438; doi:10.1128/jcm.02161-20), 2020-12-17
Supplement: JCM.02161-20-s0001.pdf [file JCM.02161-20-s0001.pdf]

## Supplemental data

Table S1: Experimental studies identified through literature search to determine the cross-reactive antigenic variants to Bexsero<sup>®</sup> (4CMenB) vaccine included for combined analysis.

| <b>Study</b>                | <b>Year</b> | <b>Assay</b> | <b>Country of isolate collection</b> | <b>No. of meningococcal isolates studied</b> | <b>Reference</b> |
|-----------------------------|-------------|--------------|--------------------------------------|----------------------------------------------|------------------|
| Abad <i>et al.</i>          | 2016        | MATS         | Spain                                | 300                                          | 1                |
| Bettinger <i>et al.</i>     | 2013        | MATS         | Canada                               | 157                                          | 2                |
| Budroni <i>et al.</i>       | 2016        | MATS         | UK                                   | 40                                           | 3                |
| Mowlabococcus <i>et al.</i> | 2016        | MATS         | Australia                            | 278                                          | 4                |
| Mulhall <i>et al.</i>       | 2018        | MATS         | Republic of Ireland                  | 105                                          | 5                |
| Parikh <i>et al.</i>        | 2017        | MATS         | UK                                   | 251                                          | 6                |
| Rajam <i>et al.</i>         | 2017        | MATS         | US                                   | 442                                          | 7                |
| Vogel <i>et al.</i>         | 2013        | MATS         | European                             | 1052                                         | 8                |
| Wasko <i>et al.</i>         | 2016        | MATS         | Poland                               | 196                                          | 9                |
| Abad <i>et al.</i>          | 2015        | MATS         | Spain                                | 10                                           | 10               |
| Green <i>et al.</i>         | 2018        | MATS         | UK                                   | 69                                           | 11               |
| Kesanopoulos <i>et al.</i>  | 2018        | MATS         | Greece                               | 71                                           | 12               |
| Stella <i>et al.</i>        | 2019        | MATS         | UK                                   | 34                                           | 13               |

Table S2: Experimental studies identified through literature search to determine the cross-reactive antigenic variants to Trumenba® (rLP2086) vaccine included for combined analysis.

| <b>Study</b>             | <b>Year</b> | <b>Assay</b> | <b>Demographic of study participants</b> | <b>No. of study participants</b> | <b>Reference</b> |
|--------------------------|-------------|--------------|------------------------------------------|----------------------------------|------------------|
| McNeil <i>et al.</i>     | 2018        | MEASURE      | Adults                                   | Not relevant                     | 14               |
| Harris <i>et al.</i>     | 2017        | SBA          | Adolescents and adults                   | Not specified                    | 15               |
| Lujan <i>et al.</i>      | 2017        | SBA          | Healthcare workers                       | 17                               | 16               |
| Taha <i>et al.</i>       | 2017        | SBA          | 11-18 year olds                          | 15                               | 17               |
| Ostergaard <i>et al.</i> | 2017        | SBA          | Adolescent, young adults                 | 3596, 3304                       | 18               |
| Marshall <i>et al.</i>   | 2016        | SBA          | 11-18 year olds                          | 539                              | 19               |
| Muse <i>et al.</i>       | 2016        | SBA          | 10-13 year old children                  | 2648                             | 20               |
| Senders <i>et al.</i>    | 2016        | SBA          | 11-17 year old children                  | 2499                             | 21               |
| Vesikari <i>et al.</i>   | 2016        | SBA          | 11-18 year old children                  | 749                              | 22               |
| Reiner <i>et al.</i>     | 2016        | SBA          | Healthcare workers                       | 7                                | 23               |
| Marshall <i>et al.</i>   | 2013        | SBA          | Adults                                   | 60                               | 24               |
| Vesikari <i>et al.</i>   | 2016        | SBA          | 11-18 year olds                          | 1714                             | 25               |
| Nissen <i>et al.</i>     | 2016        | SBA          | 8-14 year old children                   | 127                              | 26               |
| Richmond <i>et al.</i>   | 2012        | SBA          | 18-25 year old adults                    | 130                              | 27               |
| Richmond <i>et al.</i>   | 2012        | SBA          | Adolescents                              | 538                              | 28               |
| Marshall <i>et al.</i>   | 2012        | SBA          | Healthy toddlers                         | 99                               | 29               |

## References

1. Abad R, Medina V, Stella M, Boccadifuoco G, Comanducci M, Bambini S, Muzzi A, Vazquez JA. 2016. Predicted Strain Coverage of a New Meningococcal Multicomponent Vaccine (4CMenB) in Spain: Analysis of the Differences with Other European Countries. *PLoS One* 11:e0150721.
2. Bettinger JA, Scheifele DW, Le Saux N, Halperin SA, Vaudry W, Tsang R. 2013. The disease burden of invasive meningococcal serogroup B disease in Canada. *Pediatric Infectious Disease Journal* 32:e20-e25.
3. Budroni S, Kleinschmidt A, Boucher P, Medini D. 2016. Pooled-sera hSBA titres predict individual seroprotection in infants and toddlers vaccinated with 4CMenB. *Vaccine* 34:2579-84.
4. Mowlaboccus S, Perkins TT, Smith H, Sloots T, Tozer S, Prempeh LJ, Tay CY, Peters F, Speers D, Keil AD, Kahler CM. 2016. Temporal Changes in BEXSERO® Antigen Sequence Type Associated with Genetic Lineages of *Neisseria meningitidis* over a 15-Year Period in Western Australia. *PLoS One* 11:e0158315.
5. Mulhall RM, Bennett D, Cunney R, Borrow R, Lucidarme J, Findlow J, Jolley KA, Bray J, Maiden MCJ, Moschioni M, Serino L, Stella M, Medini D. 2018. Potential Coverage of the 4CMenB Vaccine against Invasive Serogroup B *Neisseria meningitidis* Isolated from 2009 to 2013 in the Republic of Ireland. *mSphere* 3.
6. Parikh SR, Newbold L, Slater S, Stella M, Moschioni M, Lucidarme J, De Paola R, Giuliani M, Serino L, Gray SJ, Clark SA, Findlow J, Pizza M, Ramsay ME, Ladhani SN, Borrow R. 2017. Meningococcal serogroup B strain coverage of the multicomponent 4CMenB vaccine with corresponding regional distribution and clinical characteristics in England, Wales, and Northern Ireland, 2007-08 and 2014-15: a qualitative and quantitative assessment. *Lancet Infectious Diseases* 17:754-762.
7. Rajam G, Stella M, Kim E, Paulos S, Boccadifuoco G, Serino L, Carlone G, Medini D. 2017. Meningococcal Antigen Typing System (MATS)-Based *Neisseria meningitidis* Serogroup B Coverage Prediction for the MenB-4C Vaccine in the United States. *mSphere* 2.
8. Vogel U, Taha MK, Vazquez JA, Findlow J, Claus H, Stefanelli P, Caugant DA, Kriz P, Abad R, Bambini S, Carannante A, Deghmane AE, Fazio C, Frosch M, Frosi G, Gilchrist S, Giuliani MM, Hong E, Ledroit M, Lovaglio PG, Lucidarme J, Musilek M, Muzzi A, Oksnes J, Rigat F, Orlandi L, Stella M, Thompson D, Pizza M, Rappuoli R, Serruto D, Comanducci M, Boccadifuoco G, Donnelly JJ, Medini D, Borrow R. 2013. Predicted strain coverage of a meningococcal multicomponent vaccine (4CMenB) in Europe: a qualitative and quantitative assessment. *Lancet Infectious Diseases* 13:416-425.
9. Wasko I, Hong E, De Paola R, Stella M, Moschioni M, Taha MK, Skoczynska A. 2016. High predicted strain coverage by the multicomponent meningococcal serogroup B vaccine (4CMenB) in Poland. *Vaccine* 34:510-515.
10. Abad R, Biolchi A, Moschioni M, Giuliani MM, Pizza M, Vazquez JA. 2015. A large portion of meningococcal antigen typing system-negative meningococcal strains from Spain is killed by sera from adolescents and infants immunized with 4CMenB. *Clinical and Vaccine Immunology* 22:357-60.
11. Green LR, Lucidarme J, Dave N, Chan H, Clark S, Borrow R, Bayliss CD. 2018. Phase Variation of NadA in Invasive *Neisseria meningitidis* Isolates Impacts on Coverage Estimates for 4C-MenB, a MenB Vaccine. *Journal of Clinical Microbiology* 56.
12. Kesanopoulos K, Bratcher HB, Hong E, Xirogianni A, Papandreou A, Taha MK, Maiden MCJ, Tzanakaki G. 2018. Characterization of meningococcal carriage isolates from Greece by whole genome sequencing: Implications for 4CMenB vaccine implementation. *PLoS One* 13:e0209919.
13. Stella M, Giuliani M, Biolchi A, Tomei S, De Paola R, Bai X, Borrow R, Lucidarme J, La Gaetana R, Toneatto D, Pizza M, Serino L, Mori E, Giuliani MM. 2020. Does vaccination with 4CMenB convey protection against meningococcal serogroup B strains not predicted to be covered by MATS? A study of the UK clonal complex cc269. *Human Vaccines & Immunotherapy* 16:945-948.

14. McNeil LK, Donald RGK, Gribenko A, French R, Lambert N, Harris SL, Jones TR, Li S, Zlotnick G, Vogel U, Claus H, Abad R, Vazquez JA, Borrow R, Findlow J, Taha MK, Deghmane AE, Caugant DA, Kriz P, Musilek M, Wang X, Vuong J, Mayer LW, Pride MW, Jansen KU, Anderson AS. 2018. Predicting the Susceptibility of Meningococcal Serogroup B Isolates to Bactericidal Antibodies Elicited by Bivalent rLP2086, a Novel Prophylactic Vaccine. *MBio* 9.
15. Harris SL, Donald RG, Hawkins JC, Tan C, O'Neill R, McNeil LK, Perez JL, Anderson AS, Jansen KU, Jones TR. 2017. *Neisseria meningitidis* Serogroup B Vaccine, Bivalent rLP2086, Induces Broad Serum Bactericidal Activity Against Diverse Invasive Disease Strains Including Outbreak Strains. *Pediatric Infectious Diseases Journal* 36:216-223.
16. Lujan E, Partridge E, Giuntini S, Ram S, Granoff DM. 2017. Breadth and Duration of Meningococcal Serum Bactericidal Activity in Health Care Workers and Microbiologists Immunized with the MenB-FHbp Vaccine. *Clinical and Vaccine Immunology* 24.
17. Taha MK, Hawkins JC, Liberator P, Deghmane AE, Andrew L, Hao L, Jones TR, McNeil LK, O'Neill RE, Perez JL, Jansen KU, Anderson AS. 2017. Bactericidal activity of sera from adolescents vaccinated with bivalent rLP2086 against meningococcal serogroup B outbreak strains from France. *Vaccine* 35:1530-1537.
18. Ostergaard L, Vesikari T, Absalon J, Beeslaar J, Ward BJ, Senders S, Eiden JJ, Jansen KU, Anderson AS, York LJ, Jones TR, Harris SL, O'Neill R, Radley D, Maansson R, Pregaldien JL, Ginis J, Staerke NB, Perez JL, B, Investigators BT. 2017. A Bivalent Meningococcal B Vaccine in Adolescents and Young Adults. *New England Journal of Medicine* 377:2349-2362.
19. Marshall HS, Richmond PC, Beeslaar J, Jiang Q, Jansen KU, Garces-Sanchez M, Martinon-Torres F, Szenborn L, Wysocki J, Eiden J, Harris SL, Jones TR, Lee SS, Perez JL, Investigators AS. 2017. Meningococcal serogroup B-specific responses after vaccination with bivalent rLP2086: 4 year follow-up of a randomised, single-blind, placebo-controlled, phase 2 trial. *Lancet Infect Dis* 17:58-67.
20. Muse D, Christensen S, Bhuyan P, Absalon J, Eiden JJ, Jones TR, York LJ, Jansen KU, O'Neill RE, Harris SL, Perez JL. 2016. A Phase 2, Randomized, Active-controlled, Observer-blinded Study to Assess the Immunogenicity, Tolerability and Safety of Bivalent rLP2086, a Meningococcal Serogroup B Vaccine, Coadministered With Tetanus, Diphtheria and Acellular Pertussis Vaccine and Serogroup A, C, Y and W-135 Meningococcal Conjugate Vaccine in Healthy US Adolescents. *Pediatric Infectious Diseases Journal* 35:673-82.
21. Senders S, Bhuyan P, Jiang Q, Absalon J, Eiden JJ, Jones TR, York LJ, Jansen KU, O'Neill RE, Harris SL, Ginis J, Perez JL. 2016. Immunogenicity, Tolerability and Safety in Adolescents of Bivalent rLP2086, a Meningococcal Serogroup B Vaccine, Coadministered with Quadrivalent Human Papilloma Virus Vaccine. *Pediatric Infectious Diseases Journal* 35:548-54.
22. Vesikari T, Wysocki J, Beeslaar J, Eiden J, Jiang Q, Jansen KU, Jones TR, Harris SL, O'Neill RE, York LJ, Perez JL. 2016. Immunogenicity, Safety, and Tolerability of Bivalent rLP2086 Meningococcal Group B Vaccine Administered Concomitantly With Diphtheria, Tetanus, and Acellular Pertussis and Inactivated Poliomyelitis Vaccines to Healthy Adolescents. *Journal of the Pediatric Infectious Disease Society* 5:180-7.
23. Reiner DM, Bhuyan P, Eiden JJ, Ginis J, Harris S, Jansen KU, Jiang Q, Jones TR, O'Neill RE, York LJ, Perez JL. 2016. Immunogenicity, safety, and tolerability of the meningococcal serogroup B bivalent rLP2086 vaccine in adult laboratory workers. *Vaccine* 34:809-13.
24. Marshall HS, Richmond PC, Nissen MD, Wouters A, Baber J, Jiang Q, Anderson AS, Jones TR, Harris SL, Jansen KU, Perez JL. 2013. A phase 2 open-label safety and immunogenicity study of a meningococcal B bivalent rLP2086 vaccine in healthy adults. *Vaccine* 31:1569-75.
25. Vesikari T, Ostergaard L, Diez-Domingo J, Wysocki J, Flodmark CE, Beeslaar J, Eiden J, Jiang Q, Jansen KU, Jones TR, Harris SL, O'Neill RE, York LJ, Crowther G, Perez JL. 2016. Meningococcal Serogroup B Bivalent rLP2086 Vaccine Elicits Broad and Robust Serum Bactericidal Responses in Healthy Adolescents. *Journal of the Pediatric Infectious Disease Society* 5:152-60.

26. Nissen MD, Marshall HS, Richmond PC, Jiang Q, Harris SL, Jones TR, Jansen KU, Perez JL. 2013. A randomized, controlled, phase 1/2 trial of a *Neisseria meningitidis* serogroup B bivalent rLP2086 vaccine in healthy children and adolescents. *Pediatr Infect Dis J* 32:364-71.
27. Richmond PC, Nissen MD, Marshall HS, Lambert SB, Robertson D, Gruber WC, Jones TR, Arora A. 2012. A bivalent *Neisseria meningitidis* recombinant lipidated factor H binding protein vaccine in young adults: results of a randomised, controlled, dose-escalation phase 1 trial. *Vaccine* 30:6163-74.
28. Richmond PC, Marshall HS, Nissen MD, Jiang Q, Jansen KU, Garces-Sanchez M, Martinon-Torres F, Beeslaar J, Szenborn L, Wysocki J, Eiden J, Harris SL, Jones TR, Perez JL. 2012. Safety, immunogenicity, and tolerability of meningococcal serogroup B bivalent recombinant lipoprotein 2086 vaccine in healthy adolescents: a randomised, single-blind, placebo-controlled, phase 2 trial. *Lancet Infectious Diseases* 12:597-607.
29. Marshall HS, Richmond PC, Nissen MD, Jiang Q, Anderson AS, Jansen KU, Reynolds G, Ziegler JB, Harris SL, Jones TR, Perez JL. 2012. Safety and Immunogenicity of a Meningococcal B Bivalent rLP2086 Vaccine in Healthy Toddlers Aged 18-36 Months: A Phase 1 Randomized-controlled Clinical Trial. *Pediatr Infect Dis J* 31:1061-1068.
